# Supplementary material for: Facile synthesis of graphene quantum dots with red emission and high quantum yield
Source: Royal Society of Chemistry journal article supplement (doi:10.1039/d2nj04491a), 2023-01-01
Supplement: d2nj04491a1.pdf [file d2nj04491a1.pdf]

## SUPPORTING INFORMATION

### **Facile Synthesis of Graphene Quantum Dots with Red Emission and High Quantum Yield**

Xin-Jian Jin<sup>a</sup>, Long Tan<sup>\*b</sup>, Zhi-Qing Zhao<sup>a</sup>, Meng-Chao Li<sup>a</sup>, Qun-Yi Zhou<sup>a</sup>, Jing-Jian Zhang<sup>a</sup>,  
Tong-Bao Lv<sup>a</sup>, Qiang Deng<sup>a</sup>, Jun Wang<sup>a</sup>, Zheling Zeng<sup>a</sup>, Shuguang Deng<sup>c</sup>, and Gui-Ping Dai<sup>\*a</sup>

*a. Department of Chemical Engineering, School of Chemistry and Chemical  
Engineering, Nanchang University, Nanchang 330031, China.*

*b. School of Physics and Materials Science, Nanchang University, Nanchang 330031,  
China. Address here.*

*c. School for Engineering of Matter, Transport and Energy, Arizona State University,  
Tempe, AZ 85287, USA.*

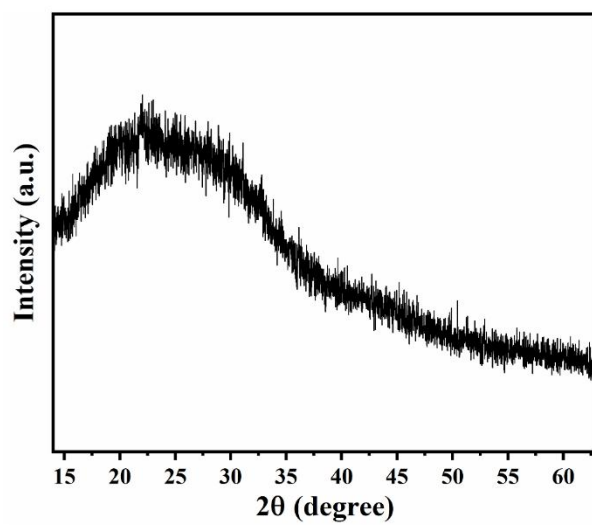

Fig. S1 XRD pattern of GQDs.

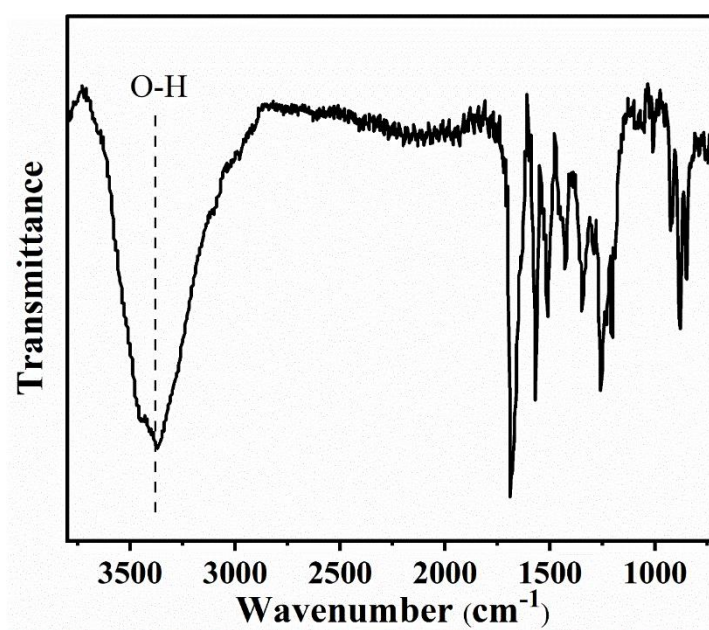

Fig. S2 FTIR spectrum of synthesized GQDs using 2,7-DHN as single carbon source under the same conditions.

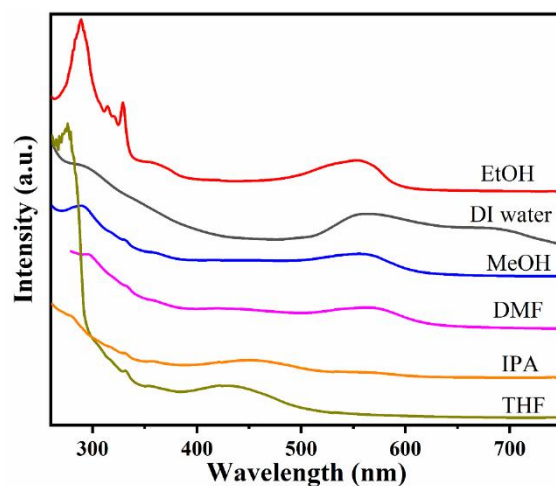

**Fig. S3** UV-vis spectra of the GQDs dissolved in various solvents.

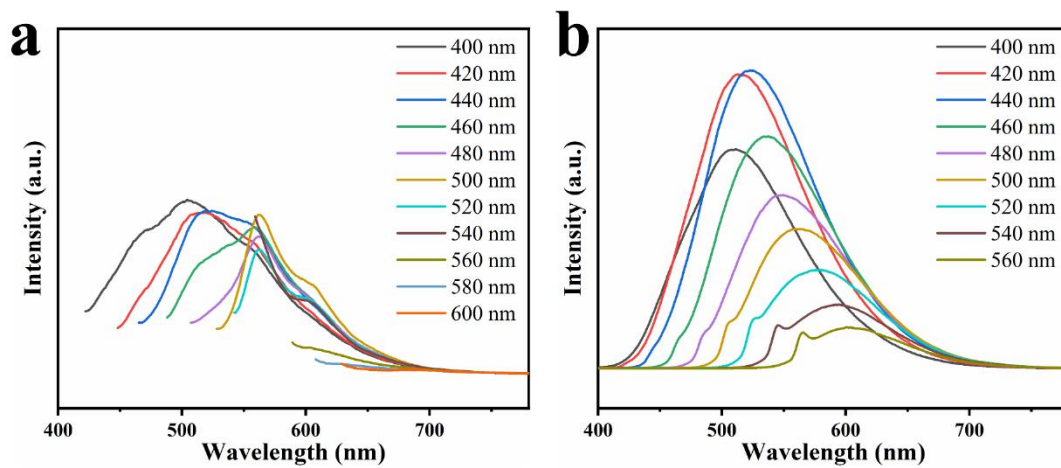

**Fig. S4** PL spectra of (a) DHN-GQDs (0.05 mg/mL) and (b) PA-GQDs (0.05 mg/mL) in ethanol solution.

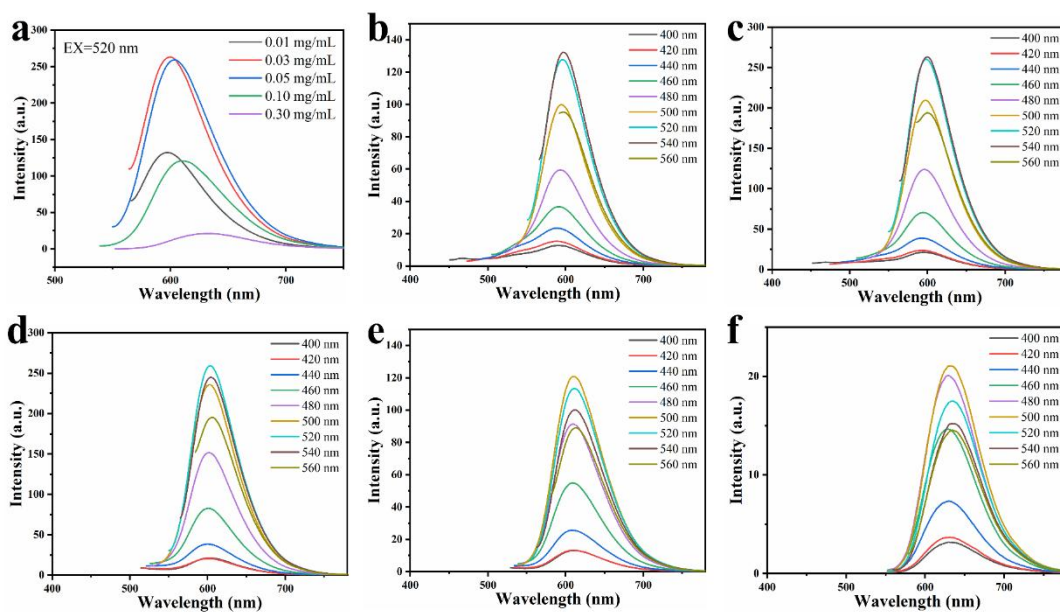

**Fig. S5** (a) The emission peak of band 2 under excitation wavelength at 520 nm with different concentrations of the GQDs in DI water. Fluorescence emission spectra for GQDs in DI water with different concentrations of (b) 0.01 mg/mL, (c) 0.03 mg/mL,

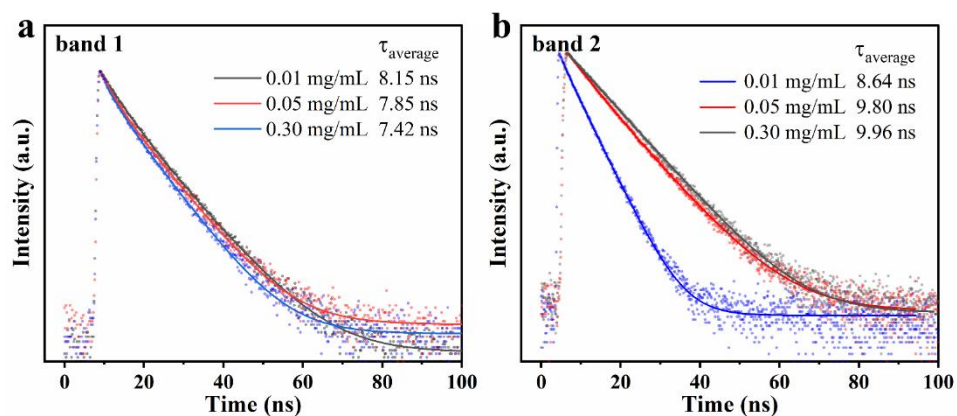

**Fig. S6** Time resolved PL decay curves of GQDs for (a) band 1 and (b) band 2 with different concentrations.

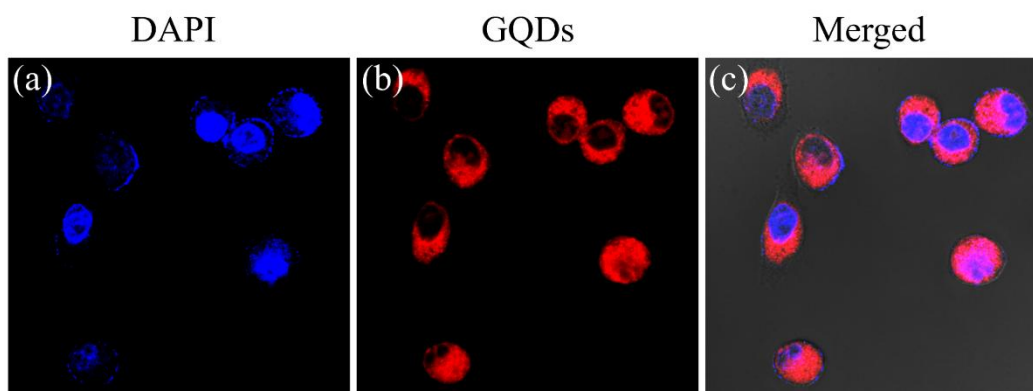

**Fig. S7** Confocal images of HeLa cells stained with DAPI and GQDs. (a) DAPI, (b) GQDs and (c) merged image of (a) DAPI and (b) GQDs.

**Table S1** Compositions of PL delay time of GQDs with concentration change (from 0.01 to 0.30 mg/mL) for the emission of band 1 and band 2 under 475 nm excitation.

| Sample | c<br>(mg/mL) | $\tau_1^a$<br>(ns) | Percentage<br>(b <sub>1</sub> ) | $\tau_2$<br>(ns) | Percentage<br>(b <sub>2</sub> ) | $\tau_{avg}^b$<br>(ns) |
|--------|--------------|--------------------|---------------------------------|------------------|---------------------------------|------------------------|
| band 1 | 0.01         | 5.03               | 34.23%                          | 9.78             | 65.77%                          | 8.15                   |
| band 1 | 0.05         | 3.66               | 23.10%                          | 9.11             | 76.90%                          | 7.85                   |
| band 1 | 0.30         | 3.48               | 22.98%                          | 8.60             | 77.02%                          | 7.42                   |
| band 2 | 0.01         | 6.33               | 33.09%                          | 9.78             | 66.91%                          | 8.64                   |
| band 2 | 0.05         | 9.15               | 93.10%                          | 18.59            | 6.90%                           | 9.80                   |
| band 2 | 0.30         | 9.96               | 100%                            | 0                | 0                               | 9.96                   |

a) The decay time of GQDs was obtained from the decay curves, which simulated by using multiexponential model  $I(t) = \sum_{i=1}^n \alpha_i \exp(-t/\tau_i)$ . The 0.30 mg/mL of band 2 shows the single exponential fluorescence decay and other wavelengths present the biexponential decay.

where  $\alpha_i$  is the pre-exponential factor for the time-resolved decay lifetime of  $\tau_i$ .

b) Average fluorescence lifetime:  $\tau_{avg} = b_1\tau_1 + b_2\tau_2$

where  $b_1$  and  $b_2$  are the fractional contributions of time-resolved decay lifetimes of  $\tau_1$  and  $\tau_2$ , respectively.

**Table S2** Summary of the QY of GQDs with red emission obtained previous reports and in this work.

| Precursor                                         | Environmental condition | QY (%) | Reference |
|---------------------------------------------------|-------------------------|--------|-----------|
| 1,3,6-trinitropyrene and boric acid               | Organic solvent         | 17.1   | 1         |
| catechol and o-phenylenediamine                   | Organic solvent         | 15     | 2         |
| catechol and o-phenylenediamine                   | Organic solvent         | 35     | 3         |
| p-phenylenediamine and dimethylformamide          | Aqueous solution        | 52     | 4         |
| graphite target                                   | Organic solvent         | 47     | 5         |
| 2,7-dihydroxynaphthalene and piperazine anhydrous | Organic solvent         | 54.9   | Our work  |

## References

- 1 R.-S. Juang, C.-T. Hsieh, C.-P. Kao, Y. A. Gandomi, C.-C. Fu, S.-H. Liu and S. Gu, *Carbon*, 2021, **176**, 61-70.
- 1 Y. Yang, C. Wang, S. Tang, D. Chen, X. Li, Z. Peng and C. Gu, *ACS Applied Nano Materials*, 2021, **4**, 12325-12334.
- 2 S. Tang, D. Chen, Y. Yang, C. Wang, X. Li, Y. Wang, C. Gu and Z. Cao, *J Colloid Interface Sci*, 2022, **617**, 182-192.
- 3 J. Zhao, Y. Zheng, Y. Pang, J. Chen, Z. Zhang, F. Xi and P. Chen, *J Colloid Interface Sci*, 2020, **579**, 307-314.
- 4 A. K. Narasimhan, S. Lakshmi B, T. S. Santra, M. S. R. Rao and G. Krishnamurthi, *RSC Advances*, 2017, **7**, 53822-53829.
